# Supplementary material
Source: publisher figshare collection journal article supplement (https://karger.figshare.com/ndownloader/files/17922053)
Supplement: Supplementary file 1 [file 17922053]

# eTable 1 Investigations and treatment per patient.

| **Patient** | **1** | **2** | **3** | **4** | **5** | **6** | **7** | **8** | **9** | **10** | **11** | **12** | **13** |
| --- | --- | --- | --- | --- | --- | --- | --- | --- | --- | --- | --- | --- | --- |
| **Albumin**  **(**40-47 g/l) | 28 | 21 | 28 | 19 | 34 | 33 | 34 | 40 | 20.7 | 30.9 | 40 | 37.4 | 30 |
| **Potassium**  (3.5-5 mmol/l) | 4.5 | 4 | 2.8 | 2.8 | 3 | 2.7 | 3.1 | 3.3 | 4.3 | 4.1 | 3,7 | 4 | 4.1 |
| **AST/ALT**  (15-37/12-78 ul/l) | 23/65 | 60/95 | 77/182 | 23/22 | 23/65 | 54/130 | 14/16 | 19/15 | 16/15 | 19/18 | ND | ND/36 | 42/22 |
| **Vitamin B-12**  (187-974 pmol/l) | 1186 | 1476 | 456 | 295 | 993 | 834 | 299 | 412 | 726 | 1024 | 1068 | 4416 | 1831 |
| **Copper**  (12.6-24.3 umol/l) | ND | ND | 16 | ND | ND | 15.9 | 15.7 | ND | ND | ND | ND | 28.9 | ND |
| **Vitamin -D**  (75-250 nmol/l) | 69.58 | 15.3 | 34.61 | 46.12 | 24 | 80 | 100 | 69.58 | 14 | 91.9 | 30 | ND | ND |
| **Thiamin**  (0.5-9.4 umol/l) | ND | ND | 0.28 | ND | ND | ND | 0.4 | ND | ND | ND | low | ND | 0.4 |
| **CSF protein** (g/l) | Normal | ND | High 0.8 | ND | ND | Normal | Normal | Normal | ND | ND | Normal | ND | ND |
| **CSF WBC** | 1 | ND | 3 | ND | ND | 1 | 2 | <3 | ND | ND | <3 | ND | ND |
| **Spine MRI** | Normal | Normal | Normal | Normal | ND | Normal | Normal | Normal | Normal | Normal | Normal | ND | Normal |
| **Treatment Multivitamins/IVIG** | +/+ | +/+ | +/+ | +/- | +/- | +/+ | +/- | +/+ | +/- | +/- | +/- | +/- | +/+ |

# eTable 2 Electrodiagnostic Findings at baseline (upon admission)

| **13** | **12** | **11** | **10** | **9** | **8** | **7** | **6** | **5** | **4** | **3** | **2** | **1** | **Normal values** | **NCS** |
| --- | --- | --- | --- | --- | --- | --- | --- | --- | --- | --- | --- | --- | --- | --- |
|  |  |  |  |  |  |  |  |  |  |  |  |  |  | **Motor** |
|  |  |  |  |  |  |  |  |  |  |  |  |  |  | **Median** |
| 3.1 | 3.2 | NA | ND | 3.9 | 2.9 | 3 | 2.94 | 2.9 | 9.65 | 3.25 | 2.5 | 3.75 | <4.5 ms | DL |
| 10.8 | 6.5 | NA | ND | 9.37 | 9 | 8.2 | 8.9 | 9.2 | 0.89 | 10.5 | 6.3 | 9.3 | >4 mV | CMAP amplitude |
| 66.7 | 56.3 | NA | ND | 54.4 | 54.8 | 66.7 | 53.4 | 58.8 | 55.3 | 61.4 | 53.3 | 57.4 | >49 m/sec | CV |
|  |  |  |  |  |  |  |  |  |  |  |  |  |  | **Ulnar** |
| 2.1 | 2.3 | NA | ND | 3 | 2.4 | 2 | 2.83 | 2.82 | 3.65 | 2.17 | 1.2 | 2.69 | <3.3ms | DL |
| 7.17 | 8 | NA | ND | 6.37 | 10.1 | 10.9 | 6.2 | 6.3 | 2.4 | 10.9 | 8.1 | 14.7 | >6 mV | CMAP amplitude |
| 66.7 | 58.1 | NA | ND | 56.8 | 63.9 | 64.3 | 54.4 | 82.3 | 42 | 60.7 | 58 | 53.6 | >49 m/sec | CV |
|  |  |  |  |  |  |  |  |  |  |  |  |  |  | **Tibial** |
| 2.01 | 3 | NA | 3.8 | NR | 3.7 | 2.7 | 7.37 | NR | NR | 4.72 | 3.5 | 4.76 | <5.8 ms | DL |
| 7.24 | 6.1 | NA | 11.3 | NR | 5.1 | 9.2 | 4.7 | NR | NR | 9.4 | 2.6 | 0.1 | >4 mV | CMAP amplitude |
| 47.4 | 34.6 | NA | 55.3 | NR | 44 | 83.6 | 36 | NR | NR | 39.1 | 4.3 | 46.8 | >41 m/sec | CV |
|  |  |  |  |  |  |  |  |  |  |  |  |  |  | **Peroneal** |
| 3.1 | 5.6 | NA | 3 | 3 | 4.1 | 3 | 4.45 | NR | NR | 2.65 | NR | NR | <6.5 ms | DL |
| 2.95 | 0.6 | NA | 1.85 | 5 | 2.3 | 4.8 | 7.7 | NR | NR | 1.3 | NR | NR | >2 mV | CMAP amplitude |
| 58.4 | 34.9 | NA | 57.7 | 50 | 42.1 | 45.5 | 41.6 | NR | NR | 45.9 | NR | NR | >44 m/sec | CV |
|  |  |  |  |  |  |  |  |  |  |  |  |  |  | **Sensory** |
|  |  |  |  |  |  |  |  |  |  |  |  |  |  | **Median** |
| 3.3 | 2.8 | NA | ND | 3.5 | 1.79 | 2.1 | 2.85 | 3.15 | 5.17 | 3.44 | 2.1 | 3.21 | <3.5 ms | DL |
| 44.4 | 4.7 | NA | ND | 26.1 | 48 | 39 | 33.3 | 5.8 | 15.6 | 61.4 | 2.1 | 32.4 | >20 uV | SNAP amplitude |
| 54.3 | 56 | NA | ND | 40.5 | 55.6 | 66.7 | 61.9 | 60.6 | 40.2 | 55.1 | 66.7 | 61.7 | >50 m/sec | CV |
|  |  |  |  |  |  |  |  |  |  |  |  |  |  | **Ulnar** |
| 3.9 | 2.3 | NA | ND | 2.4 | 1.77 | 1.9 | 2.69 | 3.6 | 2.96 | 2.81 | 1.2 | 2.83 | <3.1 ms | DL |
| 71 | 6.6 | NA | ND | 19.6 | 30 | 95 | 45.8 | 0.99 | 29.2 | 42 | 8.1 | 37.4 | >17 uV | SNAP amplitude |
| 58.8 | 60.9 | NA | ND | 45.5 | 62.1 | 70.7 | 55.6 | 61.9 | 68.8 | 53.1 | 58 | 52.1 | >50 m/sec | CV |
|  |  |  |  |  |  |  |  |  |  |  |  |  |  | **Sural** |
| 3.8 | 3.3 | NA | 2.2 | 3 | 4.7 | 2.4 | 5.02 | NR | NR | NR | 2.1 | NR | <4.4 ms | DL |
| 5.2 | 1.3 | NA | 19.7 | 10 | 7 | 22 | 13.8 | NR | NR | NR | 3.7 | NR | >6 uV | SNAP amplitude |
| 62.2 | 35.9 | NA | 64.2 | 46.6 | 43.8 | 85.3 | 36.1 | NR | NR | NR | 66.7 | NR | >40 m/sec | CV |
|  |  |  |  |  |  |  |  |  |  |  |  |  |  | **Sup. Peroneal** |
| ND | NR | NA | ND | ND | 3.4 | 2.5 | 4.4 | NR | 4NR | 3.88 | ND | ND | <4.4 ms | DL |
| ND | NR | NA | ND | ND | 7.5 | 9.1 | 13.3 | NR | NR | 9.3 | ND | ND | >6 uV | SNAP amplitude |
| ND | NR | NA | ND | ND | 52 | 56 | 40.1 | NR | NR | 47.6 | ND | ND | >40 m/sec | CV |
|  |  |  |  |  |  |  |  |  |  |  |  |  |  | **EMG** |
| VM, TA, FDI | VM, TA, Del | NA | refused | Negative in TA, Gas and FDI | VM, TA, Gas, Bi, EDC | VM, Del | VL, TA, Gas, Tri | VL, FDI, Gas | VL, TA | VL, TA, Bi | VM, TA, FDI | VL, TA, Gas |  | PSW/Fib |
| Dec | early | NA | refused | Dec | Dec | Dec VM | N | N | N | N | N | N |  | Recruitment |
| N | mixed | NA | refused | Large | Large | Large | N | N | N | N | N | N |  | MUP |

Bi: biceps muscle; CMAP: compound muscle action potential; CV: conduction velocity; Dec: decrease; Del: deltoid muscle; DL: distal latency; EDC: extensor digitorum communis; EMG: electromyography; FDI: first dorsal interosseous muscle; Fib: fibrillation; Gas: gastrocnemius muscle; MUP: motor unit potential; N: normal; NCS: nerve conduction study; ND: not done; NA: not available, Neg: negative; PSW: positive sharp wave; SNAP: sensory nerve action potential; VL: vastus lateralis muscle; VM: vastus medialis muscle; TA: tibialis anterior muscle; Tri: triceps
